# Supplementary material
Source: Springer Nature journal article supplement (https://www.springermedizin.de/resource/supplementary/12883_2012_710_MOESM3_ESM.pdf/9456150)

CSF CXCL13 (pg/mL)

10000

1000

100

10

1

HIV

LNB

Controls

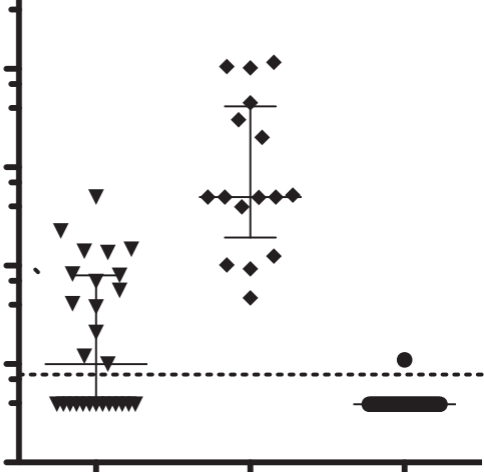

Supplement: MOESM3 [file 9456150]
